# Supplementary material for: Identification of proteotoxic and proteoprotective bacteria that non-specifically affect proteins associated with neurodegenerative diseases
Source: PubMed Central journal article supplement — iScience. 2024 Aug 27;27(9):110828. doi: 10.1016/j.isci.2024.110828 (PMC11414702; doi:10.1016/j.isci.2024.110828), 2024-08-27
Supplement: mmc1.pdf [file mmc1.pdf]

iScience, Volume 27

## **Supplemental information**

### **Identification of proteotoxic and proteoprotective bacteria that non-specifically affect proteins associated with neurodegenerative diseases**

**Alyssa C. Walker, Rohan Bhargava, Michael J. Bucher, Yoan M. Argote, Amanda S. Brust, and Daniel M. Czyż**

# Pharyngeal pumping

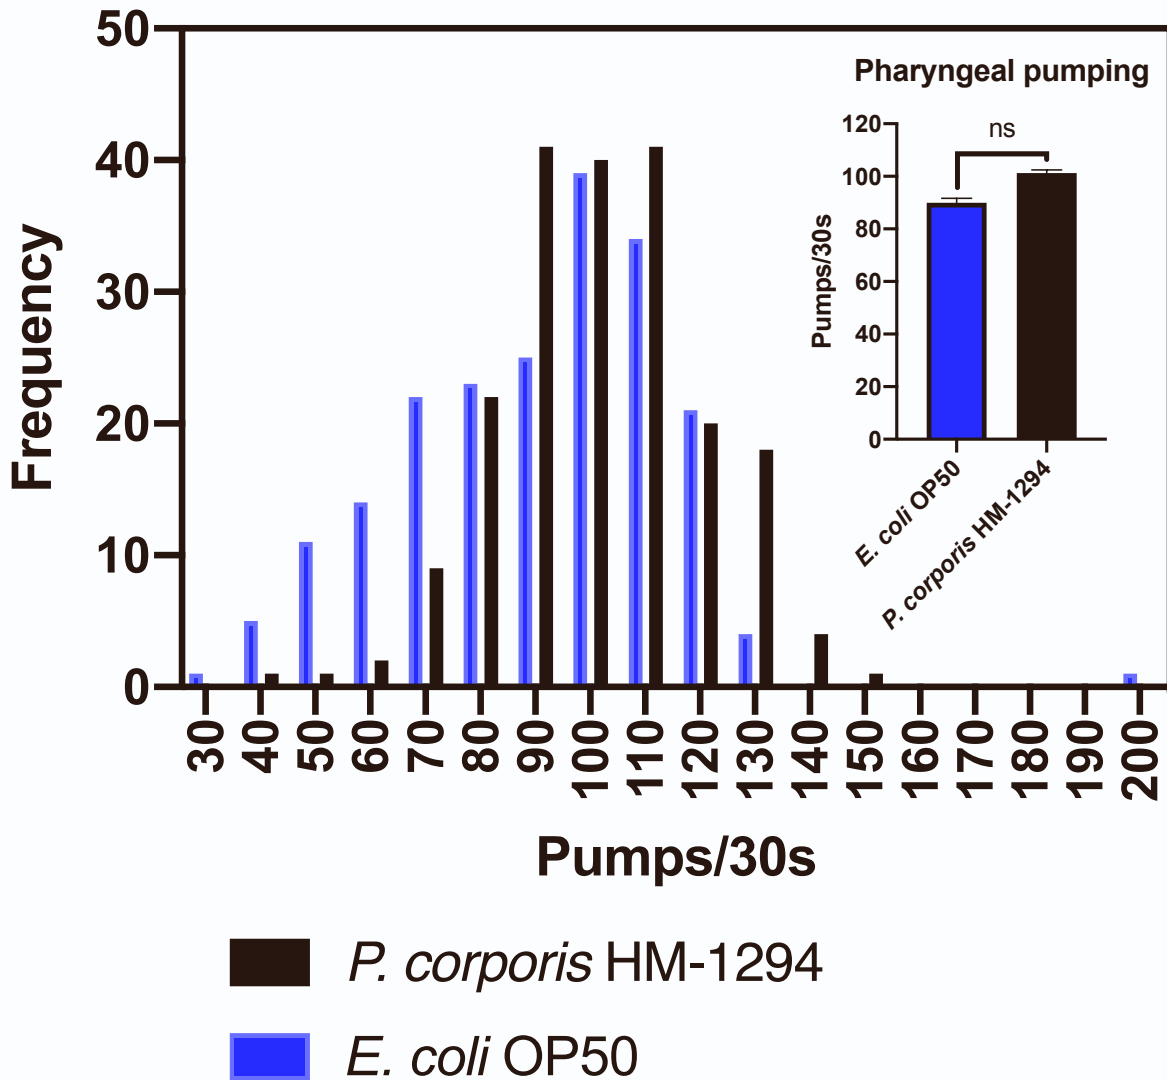

**Fig. S1. The effect of proteoprotective *P. corporis* on pharyngeal pumping, related to Figure 3.** Data are represented as the average number of pharyngeal pumps per 30 seconds for a total of ten data points per worm (N2) and three independent experiments for a total of 20 worms per condition. Mean pumping rates of worms fed *P. corporis* HM-1294 (101.22 pumps/30 sec +/- SEM 1.28) are not significantly different from those fed *E. coli* OP50 control (89.97 +/- 1.68 SEM) as determined by t-test ( $p > 0.9999$ ); distribution of pumping rates of worms fed *P. corporis* HM-1294 are not significantly different from those fed *E. coli* OP50 control as determined by Kolmogorov-Smirnov test ( $p = 0.9639$ ).

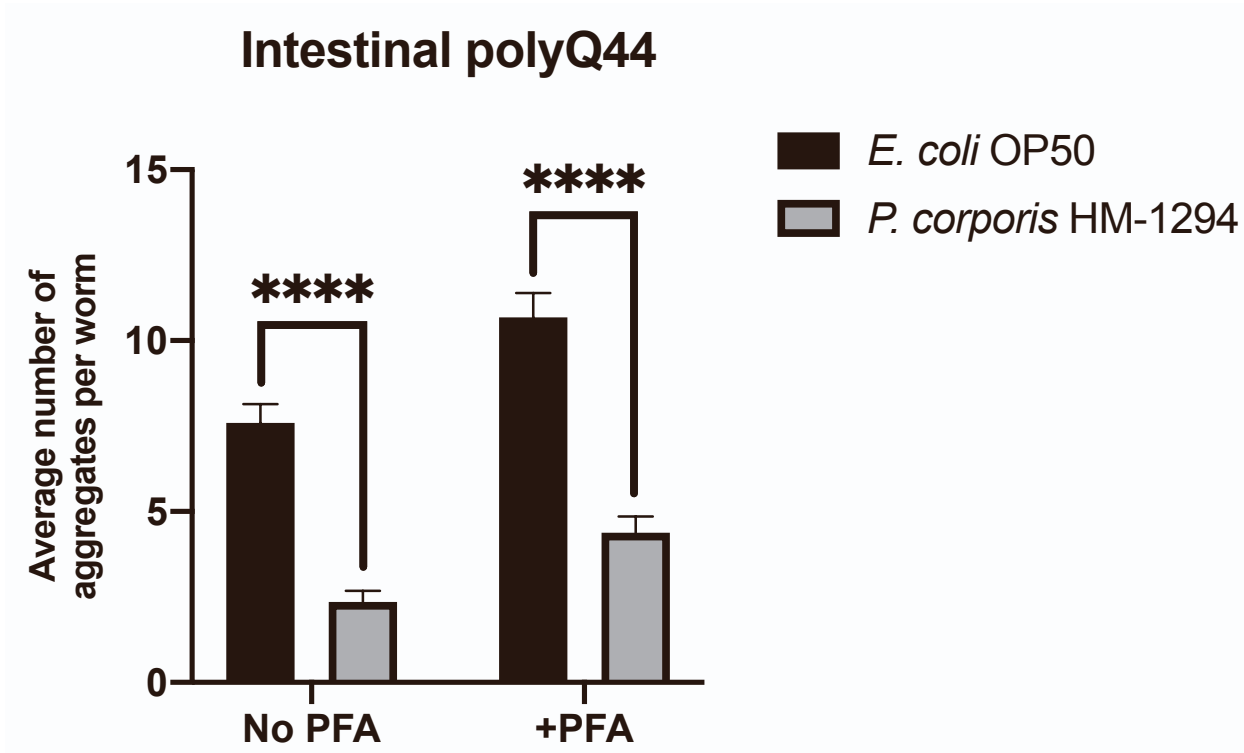

**Fig. S2. The effect of PFA-killed *P. corporis* on intestinal polyQ aggregation, related to Figure 3.** Data are represented as the average number of aggregates per intestinal polyQ44 worm. Each bar represents two independent experiments for a total of 60 worms. Error bars represent SEM. Statistical significance was calculated using Student's t-test (\*\*\*\* $p < 0.0001$ ).

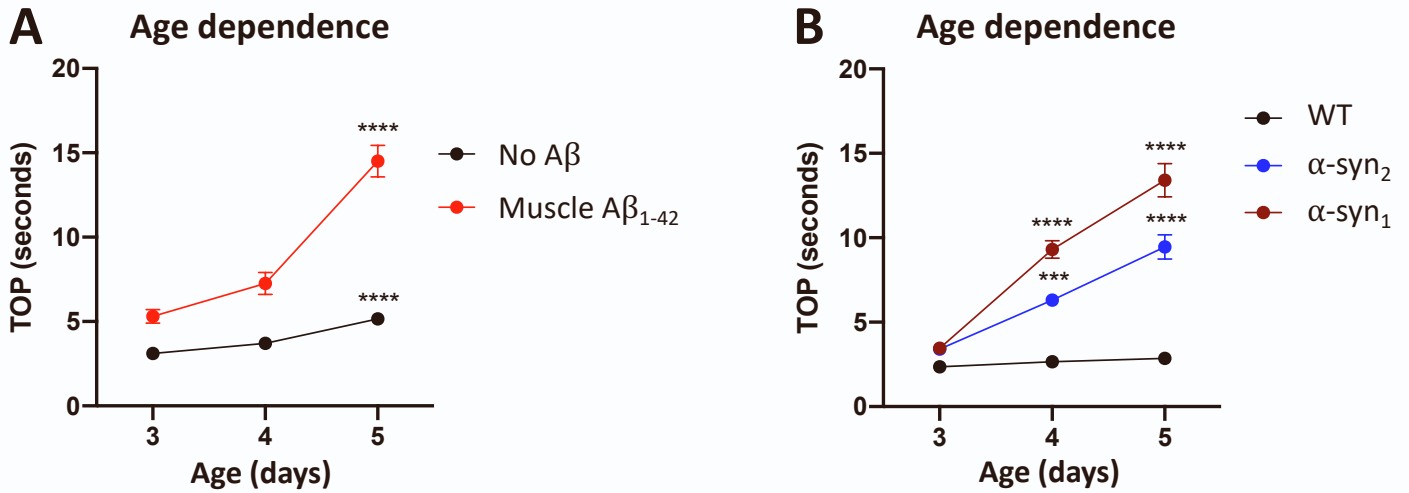

**Fig. S3. Age-dependent motility defects in transgenic animals harboring aggregation-prone A $\beta_{1-42}$  and  $\alpha$ -synuclein, related to Figures 3 and 4.** Age-dependent changes in the motility of animals expressing muscle-specific (A) A $\beta_{1-42}$  and (B)  $\alpha$ -synuclein and corresponding control animals: empty vector (No A $\beta$ ) and wild-type N2 (WT). Data are represented as the average TOP (seconds) per worm. Each data point represents two independent experiments for a total of 20 worms. Error bars represent SEM. Statistical significance was calculated using one-way analysis of variants (ANOVA) followed by multiple comparison Dunnett's post-hoc test (\*\*p<0.01, \*\*\*p<0.001, \*\*\*\*p<0.0001).

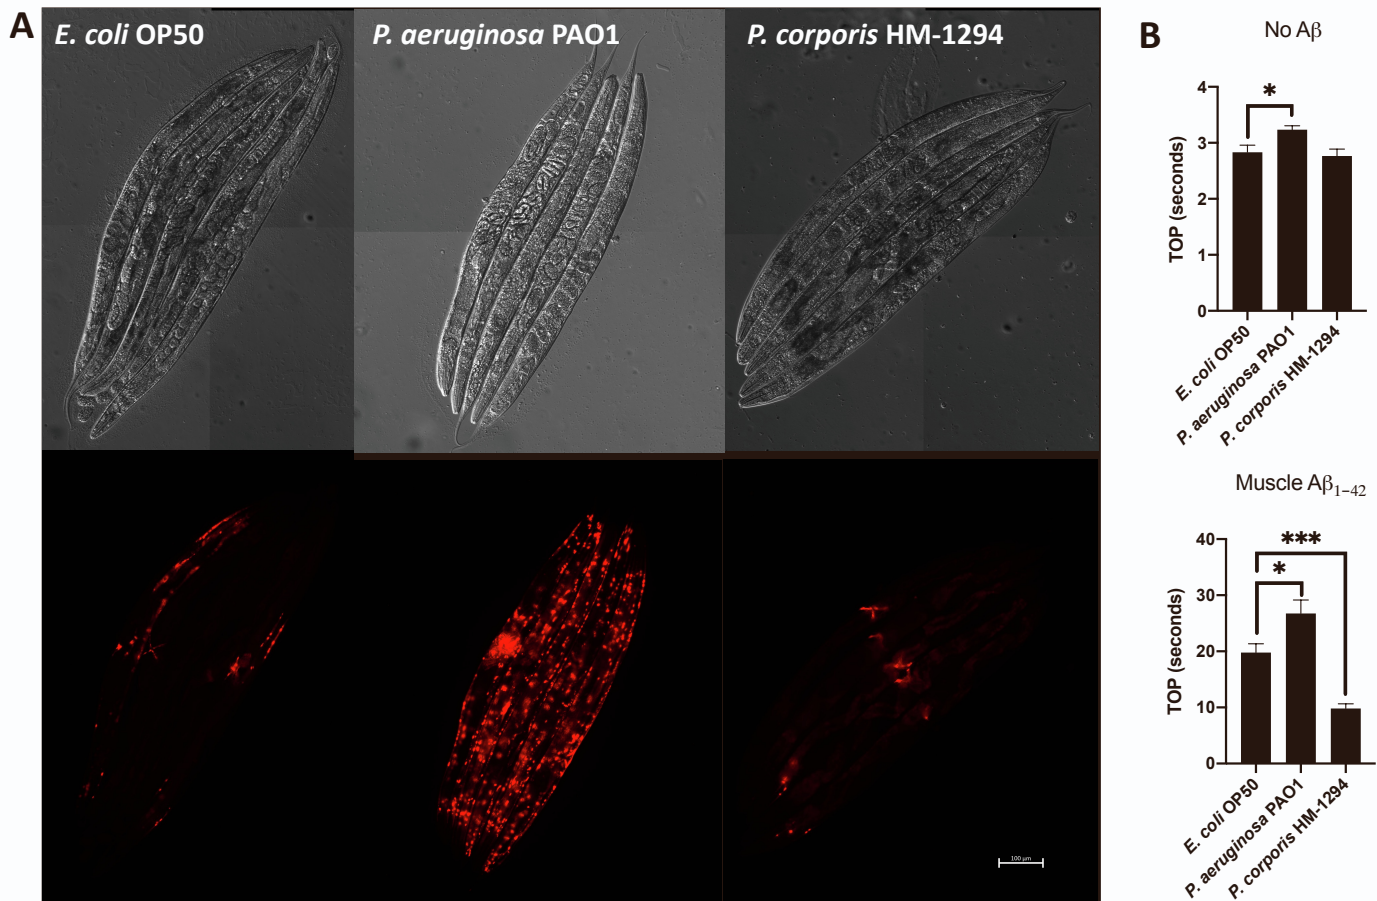

**Fig. S4. The effect of bacteria on A $\beta_{1-42}$  aggregation and the associated toxicity, related to Figure 3.** (A) Nomarski and fluorescent images (mScarlet) and the corresponding (B) TOP motility measurements of transgenic worms expressing muscle-specific A $\beta_{1-42}$  fed a proteoprotective strain (*P. corporis*) and a proteotoxic strain (*P. aeruginosa*). Data are represented as the average TOP (seconds) per worm. Each data point represents the average of three independent experiments for a total of 30 worms. Error bars represent SEM. Statistical significance was calculated using one-way analysis of variants (ANOVA) followed by multiple comparison Dunnett's post-hoc test (\* $p < 0.05$ , \*\*\* $p < 0.001$ ). Scale bar is 100  $\mu\text{m}$ .

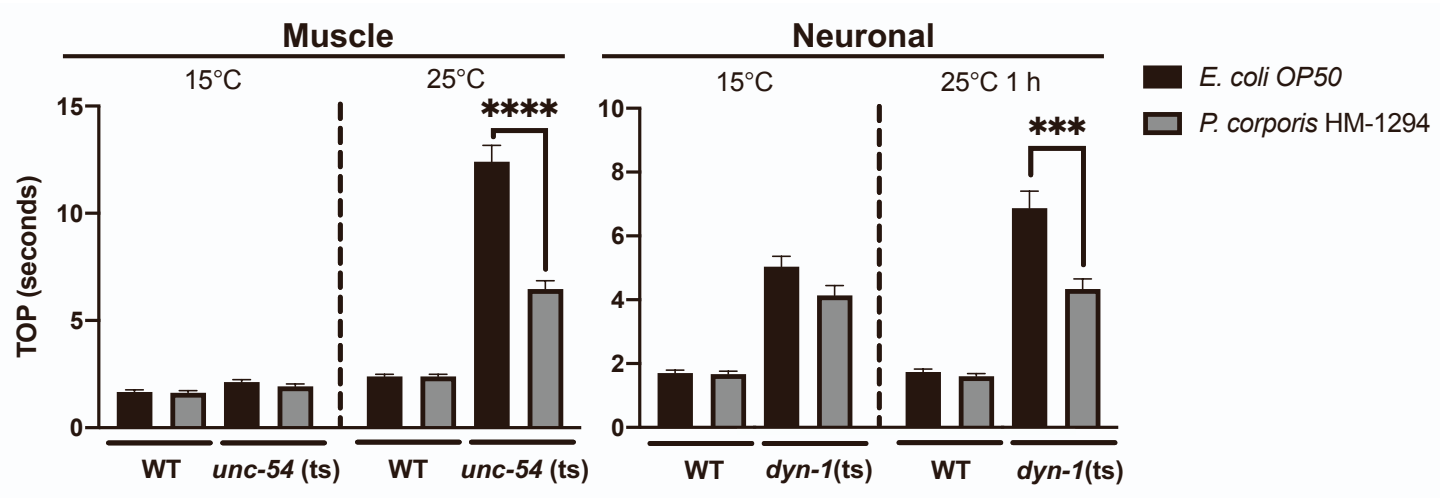

**Figure S5. The effect of *P. corporis* on temperature-dependent motility defects, related to Figure 3.**

Temperature-dependent changes in the motility of animals expressing a muscle-specific mutation in the myosin heavy-chain gene (*e1301*) ("Muscle") and mutation in the GTPase domain (*dyn-1*) ("Neuronal"). Wild-type (WT) indicates the N2 control worms, (ts) indicates the temperature-sensitive worm strain. Data are represented as the average TOP (seconds) per worm. Each data point represents three independent experiments for a total of 30 worms. Error bars represent SEM. Statistical significance was calculated using Student's t-test (\*\* $p < 0.001$ , \*\*\*\* $p < 0.0001$ ).

## Quantification of intestinal bacteria

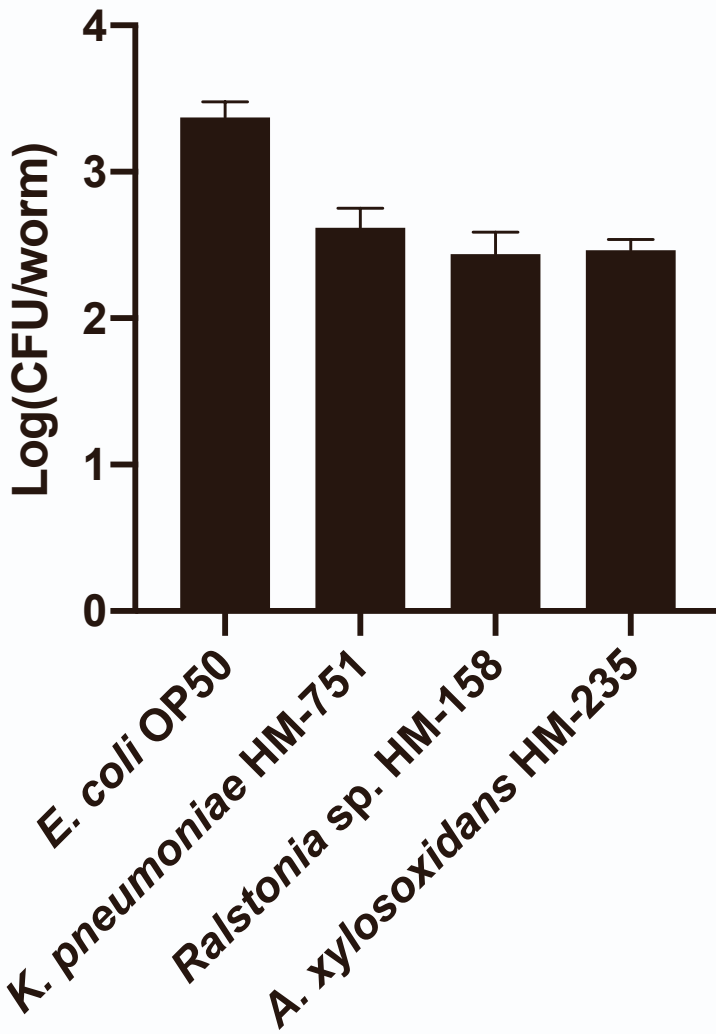

**Figure S6. Enumeration of proteotoxic bacteria in the *C. elegans* intestine, related to Figure 4.** Data are represented as the average bacterial load per N2 worm [Log(CFU/worm)]. Each bar represents three independent experiments for a total of 30 worms. Error bars represent SEM.

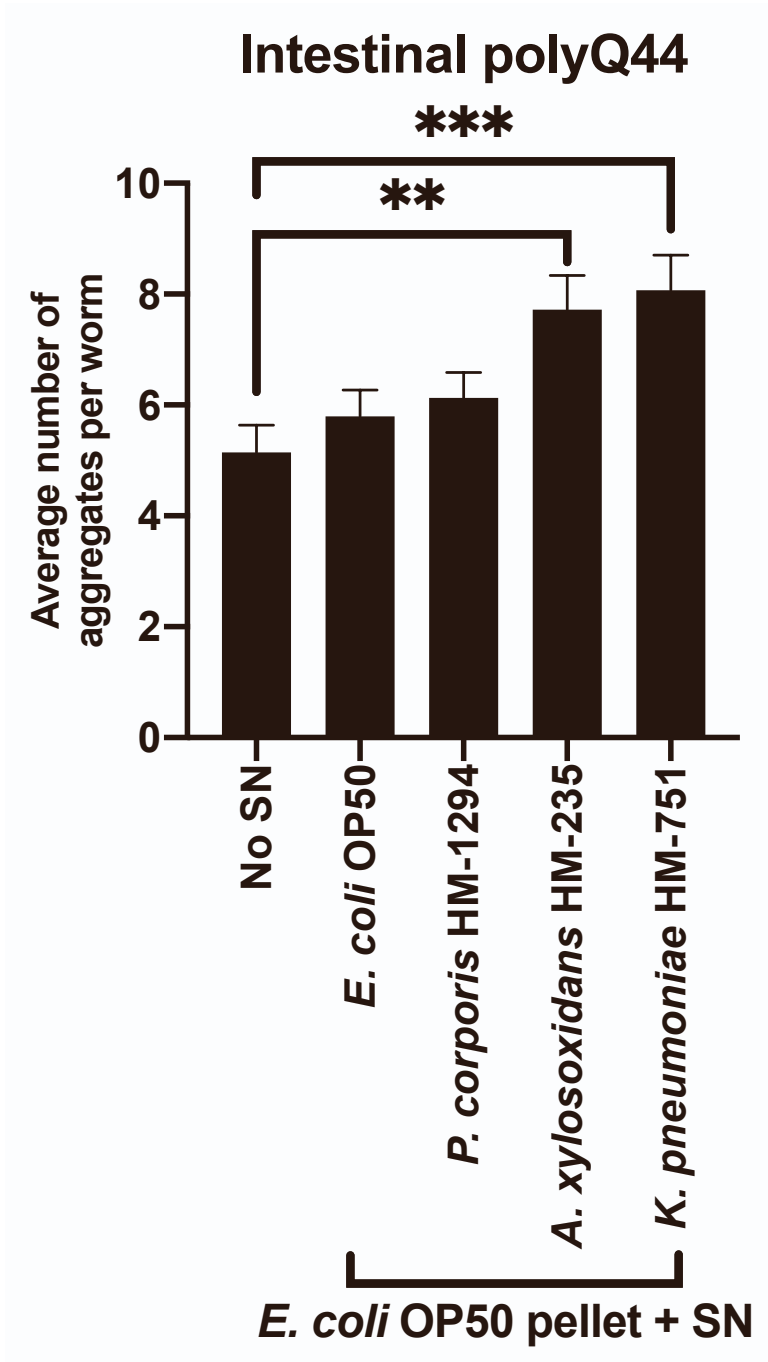

**Figure S7. The effect of bacterial supernatants on intestinal polyQ aggregation in *C. elegans*, related to Figure 4.** Data are represented as the average number of aggregates per intestinal polyQ44 worm. Each bar represents three independent experiments for a total of 98 worms. Error bars represent SEM. Statistical significance was calculated using one-way analysis of variants (ANOVA) followed by Dunnett's post-hoc test (\*\* $p < 0.01$ , \*\*\* $p < 0.001$ ).
